# Supplementary material
Source: MDPI journal article supplement (https://www.mdpi.com/2813-2432/2/1/3)
Supplement: s1 [file s1]

## Supplementary Tables

**Table S1.** Estimates of the correlation for rice markets under structural break

| Price              | Markets   | Chennai            | Mumbai | New Delhi | Patna  | Chennai   | Mumbai | New Delhi | Patna  |
|--------------------|-----------|--------------------|--------|-----------|--------|-----------|--------|-----------|--------|
|                    |           | Retail             |        |           |        | Wholesale |        |           |        |
|                    |           | Structural Break 1 |        |           |        |           |        |           |        |
| Retail             | Chennai   | 1                  | 0.001  | .572**    | -0.052 | .791**    | .277*  | .551**    | -0.068 |
|                    | Mumbai    | 0.001              | 1      | .273*     | .385** | .336**    | .459** | .418**    | .380** |
|                    | New Delhi | .572**             | .273*  | 1         | 0.201  | .602**    | .662** | .926**    | .413** |
|                    | Patna     | -0.052             | .385** | 0.201     | 1      | .249*     | 0.218  | 0.233     | .820** |
| Wholesale          | Chennai   | .791**             | .336** | .602**    | .249*  | 1         | .433** | .688**    | 0.184  |
|                    | Mumbai    | .277*              | .459** | .662**    | 0.218  | .433**    | 1      | .657**    | .337** |
|                    | New Delhi | .551**             | .418** | .926**    | 0.233  | .688**    | .657** | 1         | .404** |
|                    | Patna     | -0.068             | .380** | .413**    | .820** | 0.184     | .337** | .404**    | 1      |
| Structural Break 2 |           |                    |        |           |        |           |        |           |        |
| Retail             | Chennai   | 1                  | .966** | .955**    | .924** | .973**    | .948** | .939**    | .914** |
|                    | Mumbai    | .966**             | 1      | .948**    | .907** | .941**    | .966** | .929**    | .876** |
|                    | New Delhi | .955**             | .948** | 1         | .877** | .943**    | .931** | .956**    | .862** |
|                    | Patna     | .924**             | .907** | .877**    | 1      | .865**    | .907** | .848**    | .978** |
| Wholesale          | Chennai   | .973**             | .941** | .943**    | .865** | 1         | .912** | .914**    | .854** |
|                    | Mumbai    | .948**             | .966** | .931**    | .907** | .912**    | 1      | .959**    | .904** |
|                    | New Delhi | .939**             | .929** | .956**    | .848** | .914**    | .959** | 1         | .861** |
|                    | Patna     | .914**             | .876** | .862**    | .978** | .854**    | .904** | .861**    | 1      |
| Structural Break 3 |           |                    |        |           |        |           |        |           |        |
| Retail             | Chennai   | 1                  | .772** | .536**    | 0.157  | .876**    | .749** | .526**    | .372** |
|                    | Mumbai    | .772**             | 1      | .704**    | .370** | .762**    | .825** | .675**    | .472** |
|                    | New Delhi | .536**             | .704** | 1         | .755** | .669**    | .797** | .920**    | .765** |
|                    | Patna     | 0.157              | .370** | .755**    | 1      | .419**    | .596** | .705**    | .836** |
| Wholesale          | Chennai   | .876**             | .762** | .669**    | .419** | 1         | .822** | .724**    | .576** |
|                    | Mumbai    | .749**             | .825** | .797**    | .596** | .822**    | 1      | .740**    | .604** |
|                    | New Delhi | .526**             | .675** | .920**    | .705** | .724**    | .740** | 1         | .775** |
|                    | Patna     | .372**             | .472** | .765**    | .836** | .576**    | .604** | .775**    | 1      |

\*\* and \* indicates the significance of Pearson's correlation coefficient, respectively, at one and five per cent level of probability (2-tailed).

**Table S2.** Estimates of the correlation for wheat markets under structural break

| Price              | Markets   | Chennai            | Mumbai  | New Delhi | Patna   | Chennai   | Mumbai  | New Delhi | Patna   |
|--------------------|-----------|--------------------|---------|-----------|---------|-----------|---------|-----------|---------|
|                    |           | Retail             |         |           |         | Wholesale |         |           |         |
|                    |           | Structural Break 1 |         |           |         |           |         |           |         |
| Retail             | Chennai   | 1                  | .922**  | .959**    | .831**  | .944**    | .913**  | .928**    | .747**  |
|                    | Mumbai    | .922**             | 1       | .953**    | .833**  | .848**    | .972**  | .896**    | .720**  |
|                    | New Delhi | .959**             | .953**  | 1         | .819**  | .924**    | .947**  | .969**    | .736**  |
|                    | Patna     | .831**             | .833**  | .819**    | 1       | .704**    | .841**  | .837**    | .858**  |
| Wholesale          | Chennai   | .944**             | .848**  | .924**    | .704**  | 1         | .834**  | .897**    | .642**  |
|                    | Mumbai    | .913**             | .972**  | .947**    | .841**  | .834**    | 1       | .905**    | .756**  |
|                    | New Delhi | .928**             | .896**  | .969**    | .837**  | .897**    | .905**  | 1         | .781**  |
|                    | Patna     | .747**             | .720**  | .736**    | .858**  | .642**    | .756**  | .781**    | 1       |
| Structural Break 2 |           |                    |         |           |         |           |         |           |         |
| Retail             | Chennai   | 1                  | .889**  | .880**    | .822**  | .951**    | .861**  | .907**    | .819**  |
|                    | Mumbai    | .889**             | 1       | .900**    | .838**  | .781**    | .932**  | .897**    | .829**  |
|                    | New Delhi | .880**             | .900**  | 1         | .828**  | .849**    | .905**  | .961**    | .833**  |
|                    | Patna     | .822**             | .838**  | .828**    | 1       | .740**    | .824**  | .841**    | .995**  |
| Wholesale          | Chennai   | .951**             | .781**  | .849**    | .740**  | 1         | .791**  | .854**    | .745**  |
|                    | Mumbai    | .861**             | .932**  | .905**    | .824**  | .791**    | 1       | .902**    | .828**  |
|                    | New Delhi | .907**             | .897**  | .961**    | .841**  | .854**    | .902**  | 1         | .842**  |
|                    | Patna     | .819**             | .829**  | .833**    | .995**  | .745**    | .828**  | .842**    | 1       |
| Structural Break 3 |           |                    |         |           |         |           |         |           |         |
| Retail             | Chennai   | 1                  | .724**  | -.527**   | -0.175  | .871**    | 0.278   | -0.266    | -.627** |
|                    | Mumbai    | .724**             | 1       | -.529**   | -0.137  | .509**    | .451**  | -.451**   | -.467** |
|                    | New Delhi | -.527**            | -.529** | 1         | -.527** | -0.200    | -.562** | .721**    | .606**  |
|                    | Patna     | -0.175             | -0.137  | -.527**   | 1       | -0.252    | 0.150   | -0.244    | 0.029   |
| Wholesale          | Chennai   | .871**             | .509**  | -0.200    | -0.252  | 1         | -0.046  | 0.171     | -.514** |
|                    | Mumbai    | 0.278              | .451**  | -.562**   | 0.150   | -0.046    | 1       | -.613**   | -0.263  |
|                    | New Delhi | -0.266             | -.451** | .721**    | -0.244  | 0.171     | -.613** | 1         | 0.167   |
|                    | Patna     | -.627**            | -.467** | .606**    | 0.029   | -.514**   | -0.263  | 0.167     | 1       |

\*\* and \* indicates the significance of Pearson's correlation coefficient, respectively, at one and five per cent level of probability (2-tailed).
